# Supplementary material for: SLAM/SAP signaling regulates discrete γδ T cell developmental checkpoints and shapes the innate-like γδ TCR repertoire
Source: eLife. 2024 Dec 10;13:RP97229. doi: 10.7554/eLife.97229 (PMC11630817; doi:10.7554/eLife.97229)
Supplement: Figure 2—source data 1. [file elife-97229-fig2-data1.xlsx]

## Sheet: 2E
TCR clonotype distribution among E.17 B6 and B6.Sh2d1a-/- gamma delta T cells
TRGV4/TRDV5
	Cluster	B6-1	B6-2	B6-3	B6-4	Sh2d1a-1	Sh2d1a-2	Sh2d1a-3	Sh2d1a-4
	0
	1	0.24	0.08	0.16	0.11	0.15	0.28	0.2	0.23
	2	0.55	0.6	0.54	0.53	0.23	0.17	0.26	0.19
	3	0	0	0	0	0	0	0.02	0.04
	4	0.03	0.08	0.06	0.02	0	0	0.07	0.08
	5	0.03	0.08	0.06	0.15	0.35	0.25	0.13	0.15
	6	0.03	0	0	0	0.04	0.11	0.11	0.12
	7	0.11	0.16	0.12	0.17	0.19	0.14	0.2	0.15
	8
	9
	10	0.03	0	0.06	0.02	0.04	0.06	0	0.04
TRGV4/TRDV2-2
	Cluster	B6-1	B6-2	B6-3	B6-4	Sh2d1a-1	Sh2d1a-2	Sh2d1a-3	Sh2d1a-4
	0	0	0	0	0	0	0.05	0	0.06
	1	0	0.2	0.19	0.11	0.2	0	0.07	0.28
	2	0.44	0.27	0.45	0.53	0.3	0.16	0.39	0.28
	3	0	0	0.05	0	0	0	0.07	0
	4	0.13	0.07	0.05	0.05	0.1	0.16	0.04	0.06
	5	0.13	0.13	0.12	0.16	0.2	0.16	0.21	0.11
	6	0	0	0	0.11	0	0.21	0.04	0.11
	7	0.31	0.2	0.14	0.05	0.2	0.16	0.18	0.11
	8
	9
	10	0	0.13	0	0	0	0.11	0	0
TRGV1/TRDV4
	Cluster	B6-1	B6-2	B6-3	B6-4	Sh2d1a-1	Sh2d1a-2	Sh2d1a-3	Sh2d1a-4
	0	0.1	0.12	0.15	0.13	0.42	0.11	0.16	0.05
	1	0.48	0.38	0.47	0.28	0.19	0.18	0.31	0.5
	2	0.11	0.1	0.21	0.1	0.04	0.05	0.03	0
	3	0.07	0.14	0	0.15	0.19	0.14	0.13	0.225
	4	0	0.12	0.1	0.03	0.04	0.16	0.03	0.025
	5	0	0.02	0	0.05	0.04	0.16	0.06	0.025
	6	0	0.02	0.05	0.08	0.08	0.14	0.16	0.15
	7	0.04	0.02	0	0.05	0	0	0.03	0.025
	8	0.19	0.02	0	0.1	0	0.02	0.06	0
	9	0	0.02	0	0.03	0	0	0	0
	10	0	0.02	0	0	0	0.05	0.03	0
TRGV4/TRDV7
	Cluster	B6-1	B6-2	B6-3	B6-4	Sh2d1a-1	Sh2d1a-2	Sh2d1a-3	Sh2d1a-4
	0	0	0.09	0	0	0	0	0	0
	1	0.22	0	0.19	0	0.3	0	0.2	0.1
	2	0.33	0.36	0.14	0.29	0.2	0.2	0.1	0.1
	3	0	0	0	0	0	0	0.1	0
	4	0.11	0.55	0.24	0.43	0.2	0	0	0.3
	5	0	0	0.14	0.14	0.3	0.4	0.3	0.3
	6	0	0	0	0	0	0	0.2	0
	7	0.22	0	0.19	0.14	0	0.4	0.1	0.2
	8	0	0	0.05	0	0	0	0	0
	9
	10	0.11	0	0.05	0	0	0	0	0
	**Data shown represent the fraction of TRG/TRD pairings (number of indicated TRGV/TRDV clonotypes in a given cluster divided by the total number of indicated TRGV/TRDV clonotypes present in all clusters)
