# Supplementary material for: SLAM/SAP signaling regulates discrete γδ T cell developmental checkpoints and shapes the innate-like γδ TCR repertoire
Source: eLife. 2024 Dec 10;13:RP97229. doi: 10.7554/eLife.97229 (PMC11630817; doi:10.7554/eLife.97229)
Supplement: Figure 3—source data 1. [file elife-97229-fig3-data1.xlsx]

## Sheet: 3B
Frequency and number of immature CD4+CD8+ cMaf-RORgt+ E.17 gamma delta T cells
						Embryonic day 17 gamma delta T cells
	Expt. 1						Frequency of CD24hi (%)
		B6								B6.Sh2d1a-/-
	BLK-RORGT+	19.0135	15.9034	19.5323						31.5439	27.3689	27.8299	28.6275
	BLK+RORGT+	30.6389	34.0966	28.9086						15.8968	15.5014	18.1012	15.6863
	BLK+RORGT-	21.5558	21.8984	21.1997						15.3142	10.8556	11.6588	12.9804
	BLK-RORGT-	28.7918	28.1016	30.3595						37.2451	46.2741	42.41	42.7059
	MAF+RORGT+	35.0282	40.2998	33.9541						20.3496	22.3091	25.6651	23.0196
	MAF+RORGT-	28.7484	28.8093	29.0602						23.221	27.8289	25.5608	24.1961
	Expt. 2
	BLK-RORGT+	18.6736	23.3094	30.3675	23.1405	28.6204	34.0194	35.1724		48.2517	43.1497	41.6351	41.8962	45.4879	48.8251	50.4921
	BLK+RORGT+	32.2862	22.0144	14.7002	24.7934	25.8783	17.9177	20.6897		9.44056	15.7784	16.026	12.8708	13.6967	4.17755	3.24803
	BLK+RORGT-	24.6073	17.2662	12.766	18.1818	14.0531	10.6538	16.5517		5.41958	7.28696	6.84894	6.99153	6.09253	4.17755	1.37795
	BLK-RORGT-	24.4328	37.4101	42.1663	33.8843	31.4482	37.4092	27.5862		36.8881	33.785	35.49	38.2415	34.7229	42.8198	44.8819
	MAF+RORGT+	35.2531	26.3309	27.3694	33.0579	36.2468	32.6877	28.6207		25.6993	25.5345	27.098	24.0466	30.1878	21.4099	22.5394
	MAF+RORGT-	31.4136	28.3453	26.4023	29.4766	26.0497	23.4867	23.7931		19.4056	19.1207	20.0325	17.9555	19.9267	20.6266	18.1102
						Embryonic day 17 gamma delta T cells
	Expt. 1						Cell Numbers
		B6								B6.Sh2d1a-/-
	MAF+RORGT+	9768.93	9791.98	6364.22						8664.72	3784.5	6442.06	5771.37
	MAF+RORGT-	8017.52	6999.99	5446.9						7720.94	4074	6214.38	5146.1
	Expt. 2
	MAF+RORGT+	8773.62	4113.26	3818.65	6103.52	4032.6	4710.96	4612.74		5835.4	2800.97	4037.86	5564.27	4114.36	3517.36	3335.58
	MAF+RORGT-	6305.43	2955.44	3174.57	6964.73	5030.27	4691.87	4848.45		4406.3	2097.46	2985.07	4154.81	2715.89	3388.58	2680.07

## Sheet: 3C
			CD24pos CD73neg E.17 thymus Vgamma4 T cells
			B6										B6.SAP-/-
			Exp-1	Exp-1	Exp-1	Exp-1	Exp-1						Exp-1	Exp-1	Exp-1	Exp-1	Exp-1
		BLK	1.03699	0.954056	1.06287	0.942465	1.00362						0.906393	1.00192	0.890405	0.882412	0.838246
		cMAF	1.06192	1.01667	0.965638	0.935676	1.0201						1.00574	1.13542	0.975157	0.986705	1.05069
		RORγt	1.06497	0.998054	0.817414	0.806506	1.31305						0.902538	0.945579	0.823752	0.782627	0.92288
			Exp-2	Exp-2	Exp-2	Exp-2	Exp-2						Exp-2	Exp-2	Exp-2	Exp-2	Exp-2
		BLK	1.07215	1.03966	0.936643	0.811745	1.13981						0.779743	0.791325	0.7859	0.880929	0.766028
		cMAF	0.958047	0.880071	0.88621	1.34035	0.93532						0.801181	0.893002	0.930749	1.06959	0.809932
		RORγt	1.12905	1.05133	1.10018	0.682835	1.03661						0.685108	0.9063	0.838909	1.0337	0.71661
			Exp-3	Exp-3	Exp-3	Exp-3	Exp-3	Exp-3	Exp-3	Exp-3	Exp-3		Exp-3	Exp-3	Exp-3	Exp-3	Exp-3	Exp-3	Exp-3
		BLK	0.97586	1.01734	1.02904	1.0023	1.0813	0.928153	0.995915	0.969782	1.00032		0.937573	0.87133	0.809038	0.827118	0.841096	0.81466	0.845654
		cMAF	0.907615	0.975204	0.960375	1.0311	1.08072	1.01299	1.03709	1.00458	0.990319		1.03481	1.0609	0.961088	1.03695	1.00928	1.01042	1.00971
		RORγt	0.998553	0.913943	0.962987	0.980317	1.04533	0.971482	1.00308	1.08701	1.03729		0.959363	0.910885	0.834091	1.03242	0.979411	0.889025	0.777231

## Sheet: 3D
						CD24+ MAFneg RORgtpos E.17 gamma delta T cells
		Frequency (%)
			B6								B6.SAP-/-
	Expt. 1	CD4+8-	0.2173	0.14571	0.28151						0.87391	0.091996	0.31299	0.19608
		CD4+8+	9.82182	6.59867	9.5929						12.8173	10.6256	9.88524	11.098
		CD4-8+	3.32464	2.43547	3.4647						10.0291	8.46366	8.13772	8.35294
		CD4-8-	1.32551	0.79101	1.27761						3.53725	1.51794	1.98226	1.92157
	Expt. 2	CD4+8-	0.52356	0.28777	0.58027	1.37741	0.8569	1.21065	0.68966		1.22378	1.14423	0.73091	0.90042	0.64132	1.04439	0.59055
		CD4+8+	5.41012	6.47482	7.15667	6.47383	9.85433	11.9855	18.2759		13.4615	15.5375	15.1056	15.7839	15.1168	21.9321	17.7165
		CD4-8+	3.66492	3.45324	2.70793	2.06612	2.39931	1.69492	2.75862		10.3147	7.16652	7.09258	6.62076	6.64224	3.13316	5.01969
		CD4-8-	2.26876	6.33094	4.64217	3.30579	3.08483	3.1477	4.82759		5.59441	6.35351	4.62913	5.29661	4.12277	2.87206	5.80709
		Cell numbers
			B6								B6.SAP-/-
	Expt. 1	CD4+8-	60.6017	35.4045	52.7644						262.106	16.6291	57.4512	39.2908
		CD4+8+	2739.18	1603.32	1798.07						3844.34	1920.67	1814.55	2223.84
		CD4-8+	927.206	591.768	649.414						3008	1529.84	1493.72	1673.76
		CD4-8-	369.667	192.192	239.471						1060.93	274.383	363.855	385.05
	Expt. 2	CD4+8-	128.683	41.3597	136.579	240.481	207.417	152.345	92.0171		277.866	125.519	108.913	208.351	87.4065	171.576	87.3945
		CD4+8+	1329.72	930.6	1684.52	1130.23	2385.2	1508.22	2438.4		3056.55	1704.33	2250.81	3652.26	2060.27	3603.02	2621.81
		CD4-8+	900.773	496.312	637.374	360.713	580.769	213.279	368.072		2342.09	786.121	1056.86	1531.94	905.288	514.726	742.857
		CD4-8-	557.63	909.919	1092.63	577.137	746.71	396.094	644.122		1270.28	696.935	689.778	1225.6	561.901	471.837	859.382
