# Supplementary material for: SLAM/SAP signaling regulates discrete γδ T cell developmental checkpoints and shapes the innate-like γδ TCR repertoire
Source: eLife. 2024 Dec 10;13:RP97229. doi: 10.7554/eLife.97229 (PMC11630817; doi:10.7554/eLife.97229)
Supplement: Figure 4—source data 1. [file elife-97229-fig4-data1.xlsx]

## Sheet: 4E
Comparison of BLK, RORgt, and cMaf expression among neonatal thymic gamma delta T cells
								Day 9 neonatal thymus CD24pos CD73neg Vgamma4 T cells
		B6									B6.Sh2d1a-/-
	Expt. 1
	BLKneg RORγtpos	2.9	4.43	2.41	5.14	3.26	2.94	2.1			18.3	17.2	16	21.2	14.5	17.3	18.8
	BLKpos RORγtpos	35.9	40.6	35.5	37.8	44.7	43.1	43			29.9	23.8	26.3	32.9	23.4	32.4	30.7
	BLKpos RORγtneg	45.6	36.1	41.8	34.7	35.6	37.6	41.3			19.9	19.9	21.1	17.8	22.2	21	19.6
	BLKneg RORγtneg	16.3	18.9	20.3	22.4	16.4	16.3	13.7			31.9	39	36.6	28.1	39.9	29.3	30.9
	Expt. 2
	BLKneg RORγtpos	6.62	7.46	5.92							22.7	21.7	26.6	18.6
	BLKpos RORγtpos	46.9	49.1	53.3							30.9	31	32.4	33.2
	BLKpos RORγtneg	31.9	31.5	31.6							18	15.8	18.8	18.7
	BLKneg RORγtneg	14.6	11.9	9.16							28.5	31.6	22.2	29.5
	Expt. 3
	BLKneg RORγtpos	13.8	9.68	8.03							10.3	15.7	16	16	15.4
	BLKpos RORγtpos	19.8	39.7	28							17.7	26	25.9	22.4	26.4
	BLKpos RORγtneg	36.8	34.4	39.2							37	29.6	27.9	26	29.9
	BLKneg RORγtneg	29.6	16.2	24.8							35	28.7	30.3	35.5	28.3

## Sheet: 4F
		Day 6 CD24hi thymus gamma delta T cells
		B6					B6.SAP-/-
		B6-1	B6-2	B6-3	B6-4		SAP-1	SAP-2	SAP-3	SAP-4
	BLK	5918.79	5911.52	6098.74	6916.58		4357.04	4520.62	4201.24	3937.86
	RORγt	4063.73	4150.13	3667.75	3773.82		3885.25	3654.56	3731.71	3909.7
	c-MAF	5759.65	6468.44	6204.77	6201.78		5948.86	5723.13	5261.64	5445.1
