# Supplementary material for: SLAM/SAP signaling regulates discrete γδ T cell developmental checkpoints and shapes the innate-like γδ TCR repertoire
Source: eLife. 2024 Dec 10;13:RP97229. doi: 10.7554/eLife.97229 (PMC11630817; doi:10.7554/eLife.97229)
Supplement: Figure 5—source data 1. [file elife-97229-fig5-data1.xlsx]

## Sheet: 5C
TCR clonotype distribution among neonatal B6 and B6.Sh2d1a-/- gamma delta T cells
TRGV4/TRDV5
	Cluster	B6-1	B6-2	B6-3	Sh2d1a-1	Sh2d1a-2	Sh2d1a-3
	0	0.150943	0.105263	0.137405	0.161765	0.155172	0.150685
	1	0.207547	0.175439	0.175573	0.102941	0.12069	0.123288
	2	0.0566038	0.105263	0.167939	0.132353	0.0862069	0.0547945
	3	0.0943396	0.0701754	0.0839695	0.0735294	0.0862069	0.0958904
	4	0.0188679	0.0350877	0.0381679	0.0735294	0.0689655	0.0958904
	5	0.0754717	0	0.0458015	0.191176	0.224138	0.109589
	6	0.150943	0.210526	0.167939	0.0441177	0.0517241	0.0684932
	7	0.0754717	0.157895	0.0458015	0.0294118	0.0689655	0.150685
	8	0	0.0175439	0	0	0	0
	9	0.0188679	0.0877193	0.0687023	0.0441177	0	0.0684932
	10	0.0377359	0.0175439	0.0229008	0.0294118	0.0172414	0.0273973
	11	0.0754717	0	0	0.0294118	0.0689655	0.0136986
	12	0.0377359	0	0.0458015	0.0441177	0.0172414	0.0136986
	13
	14	0	0	0	0	0.0172414	0
	15	0	0.0175439	0	0.0441177	0.0172414	0.0273973
TRGV4/TRDV2-2
	Cluster	B6-1	B6-2	B6-3	Sh2d1a-1	Sh2d1a-2	Sh2d1a-3
	0	0.145455	0.206897	0.25	0.138614	0.180952	0.0720721
	1	0.309091	0.293103	0.236486	0.158416	0.142857	0.144144
	2	0.2	0.155172	0.216216	0.158416	0.12381	0.117117
	3	0.0727273	0.12069	0.0945946	0.158416	0.114286	0.126126
	4	0.0363636	0.0172414	0.0337838	0.0891089	0.114286	0.0900901
	5	0.0181818	0.0172414	0.0202703	0.0693069	0.152381	0.243243
	6	0.0363636	0	0.0135135	0	0.0285714	0.00900901
	7	0.0181818	0.12069	0.027027	0.0594059	0.0476191	0.0720721
	8	0	0	0.027027	0.0495049	0.00952381	0.00900901
	9	0.109091	0.0689655	0.0202703	0.0693069	0.0666667	0.0720721
	10	0	0	0.00675676	0.00990099	0.00952381	0.00900901
	11
	12	0.0545455	0	0.0472973	0.019802	0.00952381	0
	13
	14	0	0	0.00675676	0.019802	0	0.036036
	15
TRGV1/TRDV4
	Cluster	B6-1	B6-2	B6-3	Sh2d1a-1	Sh2d1a-2	Sh2d1a-3
	0
	1
	2
	3	0	0	0.0185185	0.25	0.4	0.333333
	4	0	0	0	0.25	0.2	0
	5	0	0	0	0	0.2	0
	6	0	0	0.0185185	0	0	0
	7
	8	0.516129	0.72	0.388889	0.25	0	0.5
	9
	10	0.0322581	0	0.037037	0	0.2	0.166667
	11	0	0	0.0185185	0	0	0
	12
	13	0.354839	0.28	0.518519	0	0	0
	14
	15	0.0967742	0	0	0.25	0	0
TRGV4/TRDV7
	Cluster	B6-1	B6-2	B6-3	Sh2d1a-1	Sh2d1a-2	Sh2d1a-3
	0	0.0588235	0.214286	0.172414	0.0625	0.1875	0.142857
	1	0.117647	0.142857	0.344828	0.0625	0.125	0.107143
	2	0.176471	0	0.0689655	0	0.0625	0.0714286
	3	0.235294	0.142857	0.103448	0.25	0.0625	0.0714286
	4	0.117647	0.214286	0	0.1875	0.25	0.285714
	5	0	0	0.0344828	0.0625	0.0625	0.178571
	6	0.117647	0	0.0344828	0	0	0.0357143
	7	0	0.0714286	0.103448	0.25	0.125	0.0714286
	8	0	0.0714286	0.0689655	0	0.0625	0
	9	0.0588235	0.0714286	0.0344828	0.0625	0	0.0357143
	10	0	0.0714286	0	0	0	0
	11
	12	0.117647	0	0.0344828	0	0	0
	13
	14
	15	0	0	0	0.0625	0.0625	0
	**Data shown represent the fraction of TRG/TRD pairings (number of indicated TRGV/TRDV clonotypes in a given cluster divided by the total number of indicated TRGV/TRDV clonotypes present in all clusters)
